# Supplementary material for: High electrocatalytic activity of W18O49 nanowires for cobalt complex and ferrocenium redox mediators
Source: Royal Society of Chemistry journal article supplement (doi:10.1039/c4ra07906j), 2014-01-01
Supplement: c4ra07906j1.pdf [file c4ra07906j1.pdf]

Supporting Information

**Highly Electrocatalytic Activity of  $W_{18}O_{49}$  Nanowire for  
Cobalt Complex and Ferrocenium Redox Mediators**

Huawei Zhou, Yantao Shi, Qingshun Dong, Liang Wang, Hong Zhang, Tingli Ma

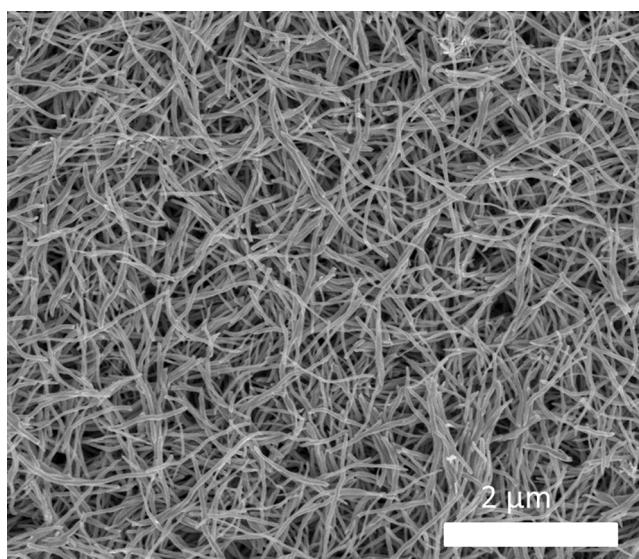

**Figure S1.** SEM of W-O-W

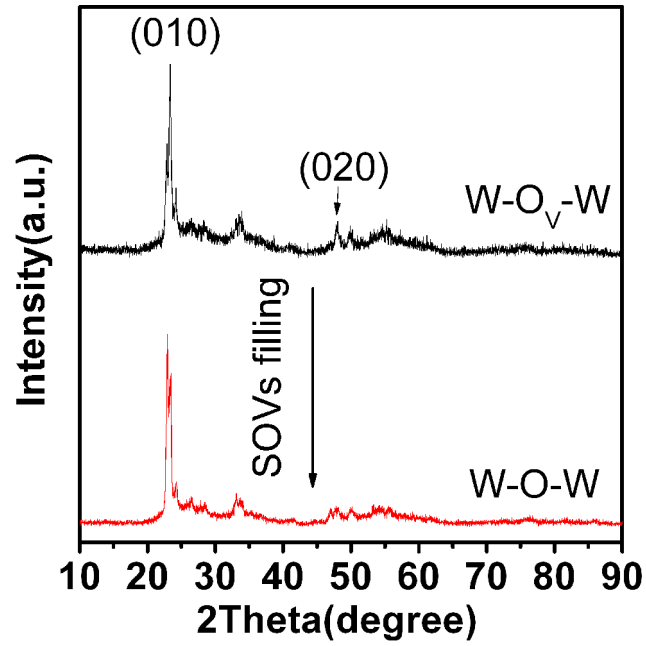

Figure S2. XRD for W-O<sub>v</sub>-W (black) and W-O-W (red), respectively.

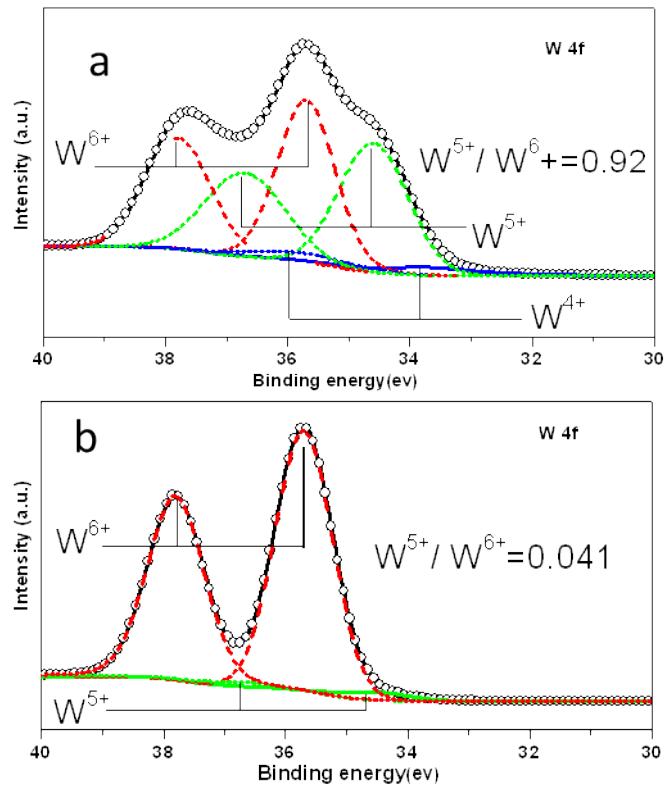

Figure S3. a) and b) are the W 4f core-level spectrum of W-O<sub>v</sub>-W and W-O-W, respectively. The ratio of W<sup>5+</sup>/W<sup>6+</sup> is obtained by fitting the curves.

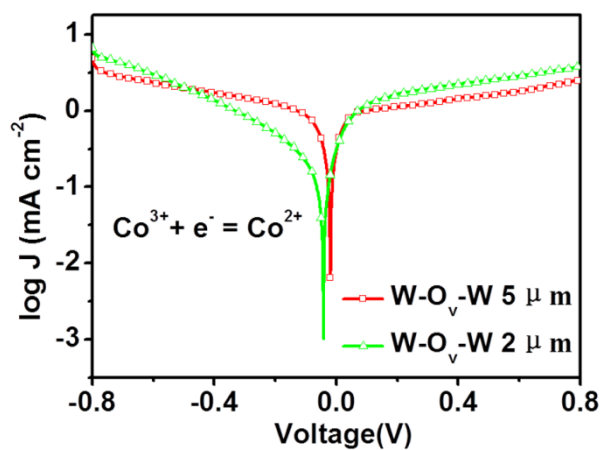

**Figure S4.** Effect of different thickness of W-O<sub>v</sub>-W on Tafel polarization.

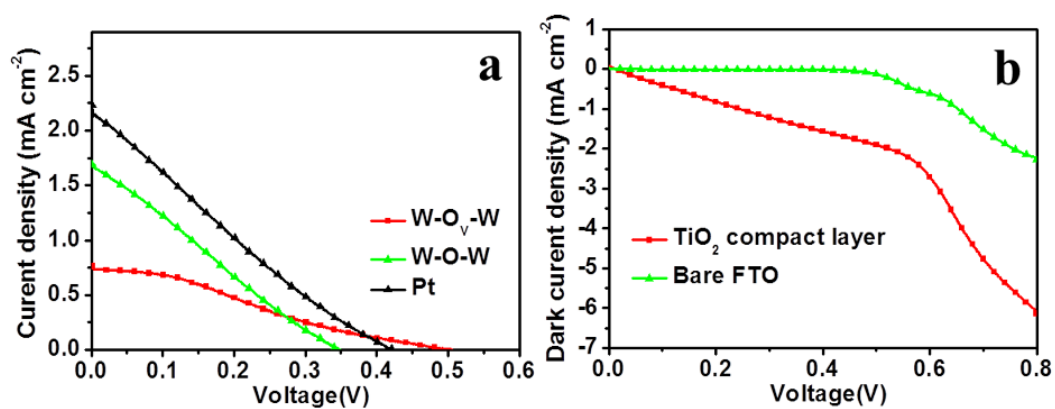

**Figure S5.** a) Photocurrent density - voltage curves of DSCs utilizing Fc/FcPF<sub>6</sub> redox mediators without TiO<sub>2</sub> blocking layer. b) Dark current with and without the TiO<sub>2</sub> blocking layer.
